# Supplementary material for: An Inexpensive CRISPR-Based Point-of-Care Test for the Identification of Meat Species and Meat Products
Source: MDPI journal article supplement (doi:10.3390/genes13050912), 2022-05-19
Supplement: s1 [file s1]

## Supplementary Information

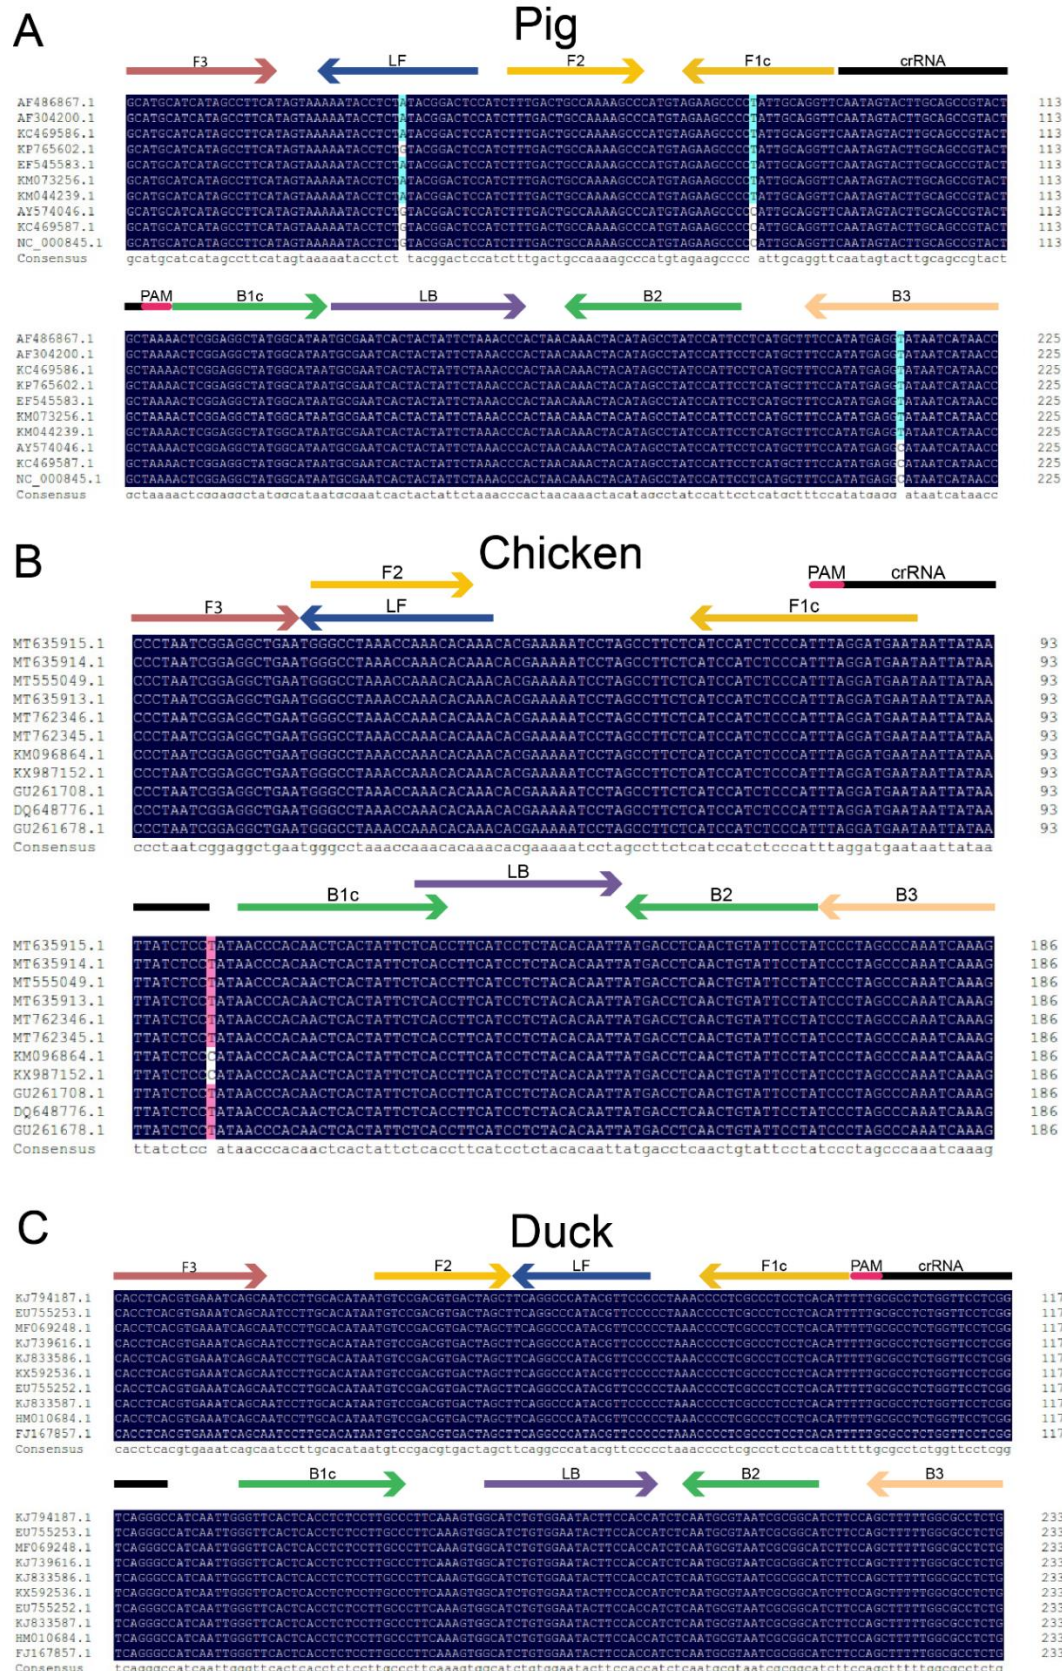

**Figure S1. Sequence alignment of partial sequences of NADH4, DN2 and D-loop genes among different pig, chicken and duck breeds, respectively. (A) pig breeds: Chinese Wuzhishan (AF486867.1), Chinese Meishan (AF304200.1), Chinese Jinhua (KC469586.1), Berkshire (KP765602.1), Bamei (EF545583.1), Tibetan (KM073256.1), Rongchang (KM044239.1), Hampshire (AY574046.1), pietrain**

(KC469587.1) and the Landrace (NC\_000845.1). **(B)** Chicken breeds: Niya (MT635915.1), Longsheng (MT635914.1), Luhua (MT555049.1), Qingyuan (MT635913.1), Wanbei game (MT762345.1), Huangshan black (MT762346.1), Wuhua three-yellow (KM096864.1), Zhengyang Yellow (KX987152.1), Red jungle fowl (GU261708.1), Tibetan (DQ648776.1), and Gushi (GU261678.1). **(C)** Duck breeds: Lin Wu (KJ794187.1), Mallard (EU755253.1), Jinding (MF069248.1), Longsheng (KJ739616.1), Xilin (KJ833586.1), Sichuan (KX592536.1), Pekin (EU755252.1), Rongshui (KJ833587.1), Shaoxing (HM010684.1) and Jianchang (FJ167857.1).

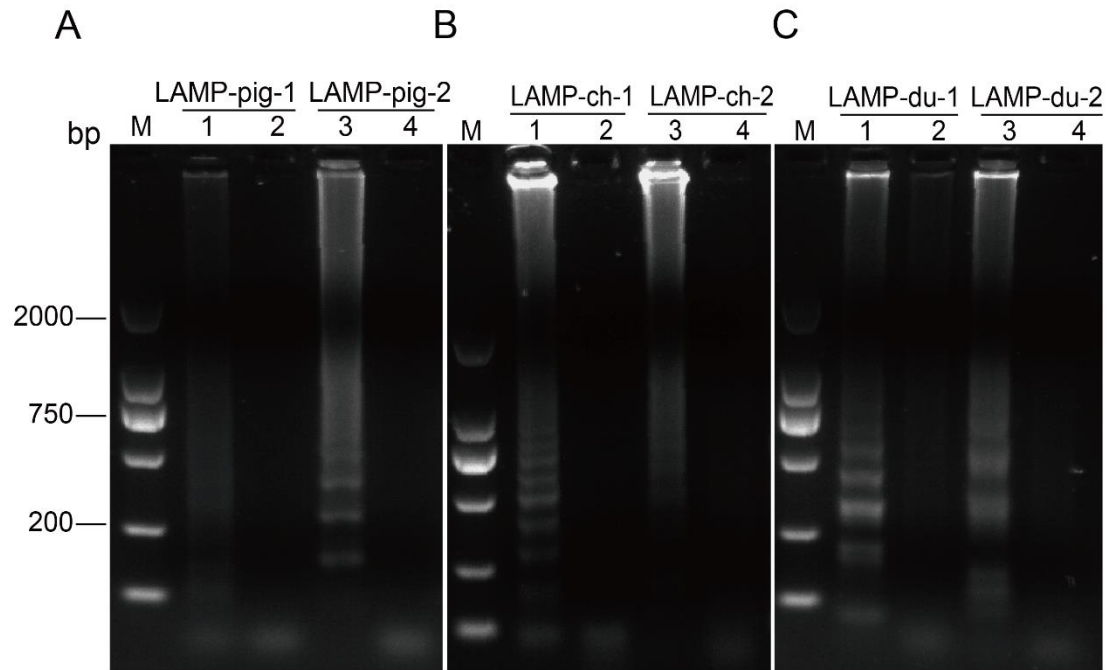

**Figure S2. Screening of LAMP primers targeting porcine, chicken and duck mitochondrial genes.** Screening of LAMP primers targeting the porcine *NADH4*, the chicken *ND2* gene and the duck *D-Loop* gene (A, B, C).

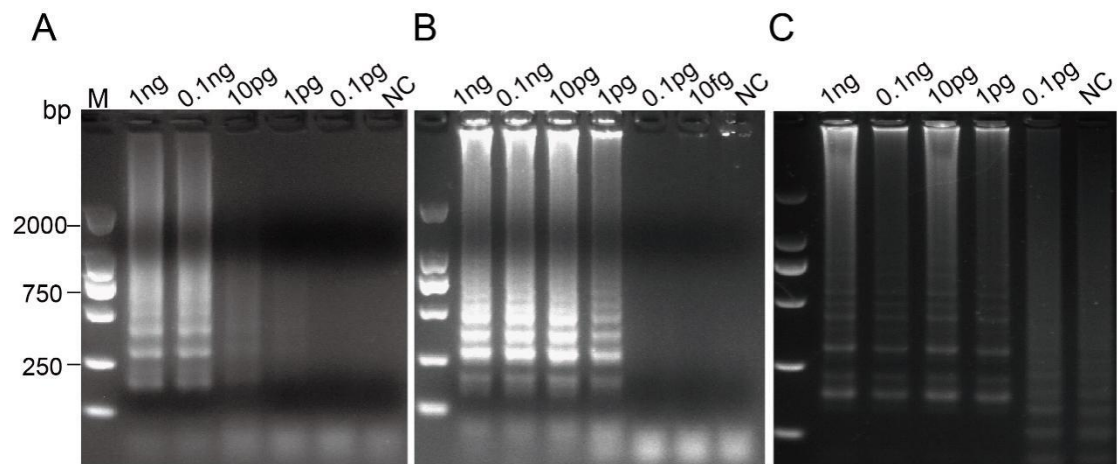

**Figure S3. Agarose gel electrophoresis determination of the limit of detection for LAMP amplification.** Agarose gel electrophoresis determination of the limit of detection for LAMP amplification of the porcine *NADH4*, the chicken *ND2* and the duck *D-Loop* genes. NC stands for negative control (A, B, C).

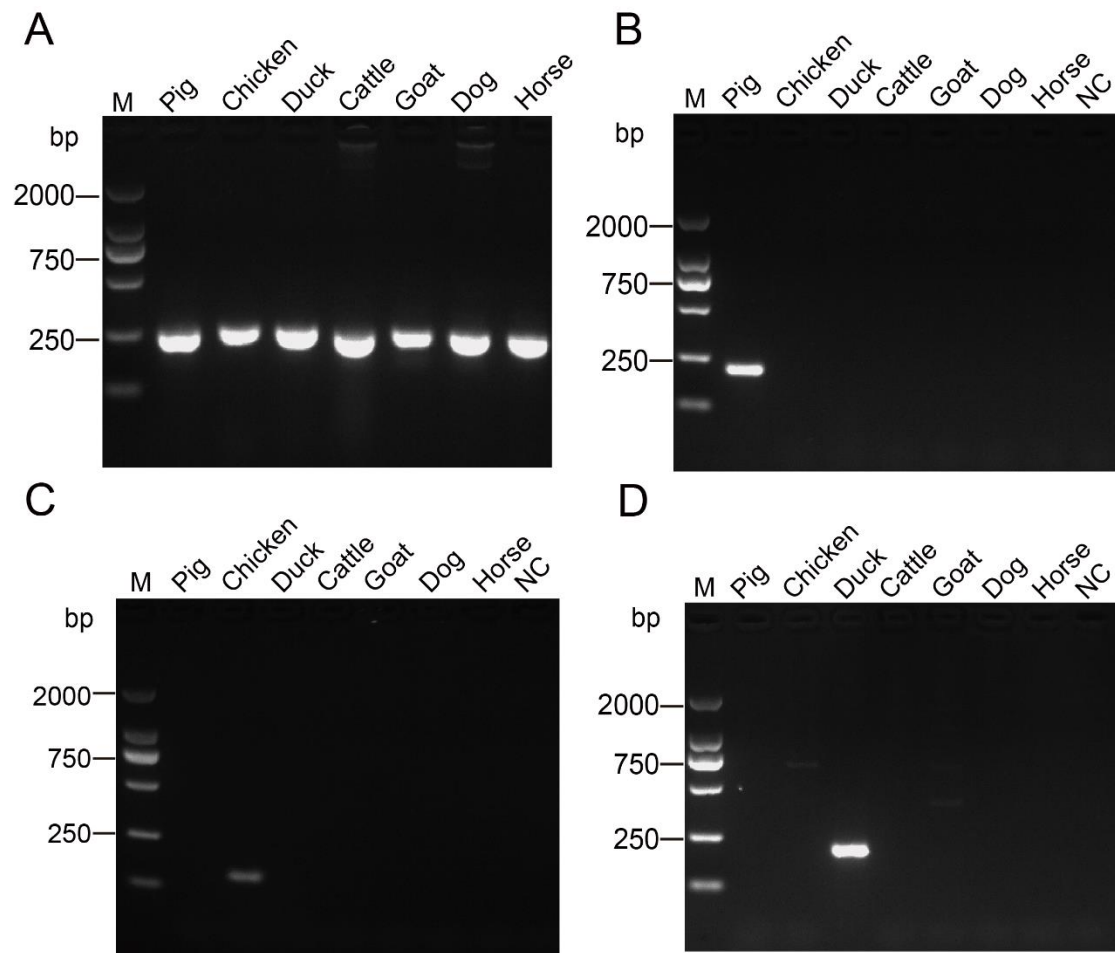

**Figure S4. Agarose gel electrophoresis of species-specific PCR.** (A) Electrophoresis of PCR-amplified products with porcine-specific primers. (B) Electrophoresis of chicken-specific primer PCR amplification products. (C) Electrophoresis of PCR-amplified products of duck-specific primers. (D) Amplification of animal genome by 18s *rRNA* universal primers. NC stands for negative control.

**Table S1: PCR amplification primers used in this study**

| <b>Name</b>   | <b>Sequences (5'-3')</b>  |
|---------------|---------------------------|
| Pig-1-F       | ATCCTGACGCATACACAGCA      |
| Pig-1-R       | ATGGGTGAAGTGGCGTCTTG      |
| Pig-2-F       | CGATATGGCCTTTCCACGTA      |
| Pig-2-R       | TGTGGGAGATTATTCCGAACCC    |
| Pig-3-F       | GCCTAAATCTCCCCTCAATGCTA   |
| Pig-3-R       | ATGAAAGAGGGCAAATAGATTTTCG |
| Pig-4-F       | CCTACATGCAAACGGAGCAT      |
| Pig-4-R       | AGGGTTGTTGGATCCGGTTT      |
| pig-5-F       | ACTGATCCCACCCATTATCCAAC   |
| pig-5-R       | ATGGTTCGGCTGTGTACTCG      |
| Chicken-1-F   | TGCCCTACTACTCTCCACCC      |
| Chicken-1-R   | GGTGGGGGTGTTTAGGGTTT      |
| Chicken-2-F   | TAGCTGGAATACCCCGACGA      |
| Chicken-2-R   | CTAGTGCGACTATCAGGGCG      |
| Chicken-3-F   | ACCTACTATACCTGCGGGCAA     |
| Chicken-3-R   | ATCCCAGTTTGGGTCCTAGC      |
| Chicken-4-F   | TAGAATATGCCGCCGGACCA      |
| Chicken-4-R   | GGTATGGGCCCAGATAGCTTAG    |
| Chicken-5-F   | CCTGAATGCAAATCAGACGCT     |
| Chicken-5-R   | GCATGGGCTGTGACGATTAC      |
| Duck-Dloop-F  | TCCTCTCCACCCACCCATTA      |
| Duck-Dloop-R  | CCCATATACGCCAACCGTCT      |
| 18s-F         | AGCCTGAGAAACGGCTACC       |
| 18s-R         | TGCTGGCACCAGACTTGC        |
| pig-PCR-F     | GCCTAAATCTCCCCTCAATGCTA   |
| pig-PCR-R     | ATGAAAGAGGGCAAATAGATTTTCG |
| chicken-PCR-F | CTATAATCGATAATCCACGATTCA  |
| chicken-PCR-R | CTTGACCTGTCTTATTAGCGAGG   |
| duck-PCR-F    | CATCTATCCTGCTAGCCGCC      |
| duck-PCR-R    | GGCTTGAGTGGAAGAATGCC      |

**Table S2: LAMP amplification primers used in this study**

| Name       | Sequences (5'-3') |                                                    |
|------------|-------------------|----------------------------------------------------|
| LAMP-pig-1 | F3                | GCATGCATCATAGCCTTCA                                |
|            | B3                | CTCATATGGAAAGCATGAGG                               |
|            | FIP               | AACCTGCAATAGGGGCTTCTGTAAAAATACCTCTATAC<br>GGACTC   |
|            | BIP               | GGAGGCTATGGCATAATGCGAATAATGGATAGGCTATGT<br>AGTTTG  |
|            | LF                | GGGCTTTTGGCAGTCAAAGATG                             |
|            | LB                | ACTATTCTAAACCCACTAA                                |
|            | F3                | GCATGCATCATAGCCTTCA                                |
| LAMP-pig-2 | B3                | GGTTATGATTATACCTCATATGGAA                          |
|            | FIP               | AACCTGCAATAGGGGCTTCTGTAAAAATACCTCTATAC<br>GGACTC   |
|            | BIP               | ACTCGGAGGCTATGGCATAAGAATGGATAGGCTATGTA<br>GTTTG    |
|            | LF                | ACATGGGCTTTTGGCAGTCAAAG                            |
|            | LB                | TGCGAATCACTACTATTCTAAACCC                          |
|            | F3                | CCCTAATCGGAGGCTGAA                                 |
|            | B3                | CTTTGATTTGGGCTAGGGA                                |
| LAMP-ch-1  | FIP               | ATTCATCCTAAATGGGAGATGGATGGGGCCTAAACCAA<br>ACACA    |
|            | BIP               | AACCCACAACCTCACTATTCTCACTAGGAATACAGTTGA<br>GGTCAT  |
|            | LF                | TTTGTGTTTGGTTTAGGCCCA                              |
|            | LB                | TCTCACCTTCATCCTCTACACAATT                          |
|            | F3                | ACTCACCTCCTAGCAAT                                  |
|            | B3                | TTAGGACTTTGATTTGGGCTA                              |
|            | FIP               | AGATGGATGAGAAGGCTAGGATTTTCTCCTCCACCCTA<br>ATCGG    |
| LAMP-ch-2  | BIP               | AACCCACAACCTCACTATTCTCACGGATAGGAATACAGT<br>TGAGGTC |
|            | LF                | TCGTGTTTGTGTTTGGTTTAGGC                            |
|            | LB                | TTCATCCTCTACACAAT                                  |
|            | F3                | CACCTCACGTGAAATCAGCA                               |
|            | B3                | CAGAGGCGCCAAAAAGCT                                 |
|            | FIP               | AATGTGAGGAGGGCGAGGGGTGTCCGACGTGACTAGC<br>T         |
|            | BIP               | GGTTCACCTCACCTCTCCTTGCCTGCCGCGATTACGCAT<br>TG      |
| LAMP-du-1  | LF                | GGGAACGTATGGGCCTGA                                 |
|            | LB                | GCATCTGTGGAATACTTCCACCA                            |
|            | F3                | CACCTCACGTGAAATCAGCA                               |
|            | B3                | TGGAGGATGCCGCGATT                                  |
|            | FIP               | CGCAAAAATGTGAGGAGGGCGATCCGACGTGACTAGC              |
|            |                   |                                                    |
|            |                   |                                                    |
| LAMP-du-2  |                   |                                                    |
|            |                   |                                                    |
|            |                   |                                                    |

|     |                                                 |
|-----|-------------------------------------------------|
|     | TTCAG                                           |
| BIP | GGTTCACCTCACCTCTCCTTGCCCCGATTGAGATGGTGG<br>AAGT |
| LF  | GGGGTTTAGGGGGAACGT                              |
| LB  | TTCAAAGTGGCATCTGTGGAAT                          |

---



**Table S3. ssDNA-reporters and crRNAs used in this study**

| <b>Name</b>      | <b>Sequences (5'-3')</b>                        |
|------------------|-------------------------------------------------|
| T7-crRNA-F       | TAATACGACTCACTATAGG                             |
| Pig-crRNA-1R     | TTGAAGAACCAACATATATCAACCATCTACAACAGTAG<br>AAAT  |
| Pig-crRNA-2R     | GAGAATATATACTTCTGGGTGTCCATCTACAACAGTAG<br>AAAT  |
| Pig-crRNA-3R     | CTATGAAGGCTGTTGCTATAACGGATCTACAACAGTAG<br>AAAT  |
| Pig-crRNA-4R     | CTATGAAGGCTGTTGCTATAACGGATCTACAACAGTAG<br>AAAT  |
| Pig-crRNA-5R     | CAATAGTACTTGCAGCCGTACTGCATCTACAACAGTAG<br>AAAT  |
| Chicken-crRNA-1R | GGAGATAATTATAATTATTCATCCATCTACAACAGTAGA<br>AAT  |
| Chicken-crRNA-2R | TAAGTGGTTTGATGCGGTTGGCTTATCTACAACAGTAG<br>AAAT  |
| Chicken-crRNA-3R | GGATACTTG CATGTATATGTCTAGATCTACAACAGTAG<br>AAAT |
| Chicken-crRNA-4R | GTGGATATGAGGCCCGGATTCATAATCTACAACAGTAG<br>AAAT  |
| Chicken-crRNA-5R | TGTAGTGAAGTTCATAATGAGTTGATCTACAACAGTAG<br>AAAT  |
| Duck-crRNA-1R    | GCCCTGACCGAGGAACCAGAGGCGATCTACAACAGT<br>AGAAAT  |
| Duck-crRNA-2R    | AAATAAAAGGAACCAGAGGCGCCAATCTACAACAGT<br>AGAAAT  |
| Duck-crRNA-3R    | AAAATAAAAGGAACCAGAGGCGCCATCTACAACAGT<br>AGAAAT  |
| Duck-crRNA-4R    | AAAAATAAAAGGAACCAGAGGCGCATCTACAACAGT<br>AGAAAT  |
| Duck-crRNA-5R    | CCCTGACCGAGGAACCAGAGGCGCATCTACAACAGT<br>AGAAAT  |
| FAM-N12-Biotin   | /5'-FAM/GTATCCAGTGCG/3' Biotin /                |
| JOE-dye          | /5'-JOE/GTATCCAGTGCG/3'BHQ1/                    |
| Texas Red-dye    | /5'-Texas Red /GTATCCAGTGCG/3'BHQ2/             |



**Table S4. Species Information**

| <b>Species</b> | <b>Breeds</b>      | <b>GeneBank Accession No.</b> |
|----------------|--------------------|-------------------------------|
| Pig            | Chinese Wuzhishan  | AF486867.1                    |
|                | Chinese Meishan    | AF304200.1                    |
|                | Chinese Jinhua     | KC469586.1                    |
|                | Berkshire          | KP765602.1                    |
|                | Bamei              | EF545583.1                    |
|                | Tibetan            | KM073256.1                    |
|                | Rongchang          | KM044239.1                    |
|                | Hampshire          | AY574046.1                    |
|                | pietrain           | KC469587.1                    |
|                | Landrace           | NC_000845.1                   |
|                | Niya               | MT635915.1                    |
|                | Longsheng          | MT635914.1                    |
|                | Luhua              | MT555049.1                    |
|                | Qingyuan           | MT635913.1                    |
|                | Wanbei game        | MT762345.1                    |
| Chicken        | Huangshan black    | MT762346.1                    |
|                | Wuhua three-yellow | KM096864.1                    |
|                | Zhengyang Yellow   | KX987152.1                    |
|                | Red jungle fowl    | GU261708.1                    |
|                | Tibetan            | DQ648776.1                    |
|                | Gushi              | GU261678.1                    |
|                | Lin Wu             | KJ794187.1                    |
|                | Mallard            | EU755253.1                    |
|                | Jinding            | MF069248.1                    |
|                | Longsheng          | KJ739616.1                    |
| Duck           | Xilin              | KJ833586.1                    |
|                | Sichuan            | KX592536.1                    |
|                | Pekin              | EU755252.1                    |
|                | Rongshui           | KJ833587.1                    |
|                | Shaoxing           | HM010684.1                    |
|                | Jianchang          | FJ167857.1                    |

**Table S5. Simulate mixed meat products ingredients**

| <b>Sample<br/>Number</b> | <b>Pig<br/>(mg)</b> | <b>Chicken<br/>(mg)</b> | <b>Duck<br/>(mg)</b> | <b>Cattle<br/>(mg)</b> | <b>Buffalo<br/>(mg)</b> | <b>Goat<br/>(mg)</b> | <b>Sheep<br/>(mg)</b> |
|--------------------------|---------------------|-------------------------|----------------------|------------------------|-------------------------|----------------------|-----------------------|
| 1                        | 13.1                | 0                       | 0                    | 0                      | 0                       | 40.1                 | 45                    |
| 2                        | 14.1                | 24.8                    | 0                    | 0                      | 0                       | 27.6                 | 30                    |
| 3                        | 13.6                | 20                      | 0                    | 0                      | 22                      | 16.2                 | 15.7                  |
| 4                        | 0                   | 0                       | 0                    | 0                      | 0                       | 50                   | 50                    |
| 5                        | 0                   | 50                      | 0                    | 0                      | 50                      | 0                    | 0                     |
| 6                        | 0                   | 18                      | 0                    | 0                      | 0                       | 37.8                 | 41.5                  |
| 7                        | 0                   | 18                      | 0                    | 31.1                   | 0                       | 29.6                 | 29.6                  |
| 8                        | 0                   | 17                      | 0                    | 17.2                   | 16.8                    | 17.3                 | 15.7                  |
| 9                        | 0                   | 0                       | 0                    | 0                      | 0                       | 50                   | 50                    |
| 10                       | 0                   | 0                       | 0                    | 50                     | 50                      | 0                    | 0                     |
| 11                       | 40.4                | 0                       | 13                   | 41.5                   | 16.1                    | 0                    | 0                     |
| 12                       | 25.9                | 0                       | 13.5                 | 27.3                   | 14.8                    | 21.7                 | 0                     |
| 13                       | 11                  | 0                       | 19.5                 | 14.3                   | 6.6                     | 12.1                 | 10                    |
| 14                       | 0                   | 0                       | 0                    | 50                     | 50                      | 0                    | 0                     |
| 15                       | 50                  | 0                       | 0                    | 0                      | 0                       | 50                   | 50                    |
